# Supplementary material for: Evidence of Leaf Consumption Rate Decrease in Fall Armyworm, Spodoptera frugiperda, Larvae Parasitized by Coccygidium luteum
Source: PubMed Central journal article supplement (PMC6920753; doi:10.3390/insects10110410), 2019-11-16
Supplement: insects-10-00410-s001.pdf [file insects-10-00410-s001.pdf]

**Table S1.** Significant tests of hypotheses for between subjects (treatment: parasitized and unparasitized *S. frugiperda* larvae) effects.

| <b>The GLM Procedure</b>                                |           |                    |                    |                |                  |
|---------------------------------------------------------|-----------|--------------------|--------------------|----------------|------------------|
| <b>Repeated Measures Analysis of Variance</b>           |           |                    |                    |                |                  |
| <b>Tests of Hypotheses for Between Subjects Effects</b> |           |                    |                    |                |                  |
| <b>Source</b>                                           | <b>DF</b> | <b>Type III SS</b> | <b>Mean Square</b> | <b>F Value</b> | <b>Pr &gt; F</b> |
| Treatment                                               | 1         | 7.67324309         | 7.67324309         | 3155.01        | <0.0001          |
| Error                                                   | 98        | 0.23834392         | 0.00243208         |                |                  |

Analysis performed at the 0.05 alpha level.

**Table S2.** Significant univariate tests of hypotheses for within subject effects.

| <b>The GLM Procedure</b>                                         |           |                    |                    |                |                  |            |            |
|------------------------------------------------------------------|-----------|--------------------|--------------------|----------------|------------------|------------|------------|
| <b>Repeated Measures Analysis of Variance</b>                    |           |                    |                    |                |                  |            |            |
| <b>Univariate Tests of Hypotheses for Within Subject Effects</b> |           |                    |                    |                |                  |            |            |
| <b>Source</b>                                                    | <b>DF</b> | <b>Type III SS</b> | <b>Mean Square</b> | <b>F Value</b> | <b>Pr &gt; F</b> | <b>G-G</b> | <b>H-F</b> |
| Day                                                              | 11        | 6.61404123         | 0.60127648         | 284.99         | <0.0001          | <0.0001    | <0.0001    |
| Day*Treatment                                                    | 11        | 7.20327241         | 0.65484295         | 310.38         | <0.0001          | <0.0001    | <0.0001    |
| Error (Day)                                                      | 1078      | 2.27440943         | 0.00210984         |                |                  |            |            |

Greenhouse-Geisser Epsilon: 0.1995; Huynh-Feldt Epsilon: 0.2063; Analysis performed at the 0.05 alpha level.
